# Supplementary material for: UPLC-QTOF-MS-Based Metabolomics and Antioxidant Capacity of Codonopsis lanceolata from Different Geographical Origins
Source: MDPI journal article supplement (doi:10.3390/foods12020267), 2023-01-06
Supplement: s1 [file s1]

**UPLC-QTOF-MS-based metabolomics and antioxidant capacity of *Codonopsis lanceolata* from different geographical origins**

Miso Nam<sup>a</sup>, Sae rom Jo<sup>a</sup>, Young-Chan Kim<sup>b</sup>, and Min-Sun Kim<sup>a,\*</sup>

<sup>a</sup>Food Analysis Research Center, Korea Food Research Institute, Republic of Korea

<sup>b</sup>Enterprise Solution Research Center, Korea Food Research Institute, Republic of Korea

\* Corresponding Authors

*E-mail addresses:* mskim@kfri.re.kr (M.S. Kim).

1 Table S1. Metabolites identified by UPLC-QTOF-MS in *C. lanceolata* extracts

| No.                        | Metabolite           | RT<br>(min) | Adduct | Precursor ion ( <i>m/z</i> ) |          | difference<br>(ppm) | Formula   | Fragment ion           | Fold change |       |
|----------------------------|----------------------|-------------|--------|------------------------------|----------|---------------------|-----------|------------------------|-------------|-------|
|                            |                      |             |        | Theoretical                  | observed |                     |           |                        | JS/JJ       | HS/JJ |
| Organic acid               |                      |             |        |                              |          |                     |           |                        |             |       |
| 1                          | alpha-Ketoglutarate  | 0.61        | [M-H]- | 145.0142                     | 145.0137 | 3.45                | C5H6O5    | 127                    | 0.85        | 0.87  |
| 2                          | Azelaic acid         | 4.98        | [M-H]- | 187.0976                     | 187.097  | 3.21                | C9H16O4   | 117, 125               | 0.70        | 0.78  |
| 3                          | Citrate              | 1.39        | [M-H]- | 191.0197                     | 191.0181 | 8.38                | C6H8O7    | 87, 111                | 0.99        | 1.05  |
| 4                          | Ascorbic acid        | 0.72        | [M-H]- | 175.0248                     | 175.0237 | 6.28                | C6H8O6    | 101, 115, 113          | 0.91        | 0.95  |
| 5                          | Fumarate             | 0.7         | [M-H]- | 115.0037                     | 115.0025 | 10.43               | C4H4O4    | 71                     | 0.82        | 0.82  |
| 6                          | Malate               | 0.7         | [M-H]- | 133.0142                     | 133.0128 | 10.53               | C4H6O5    | 71, 73, 115            | 0.82        | 0.84  |
| 7                          | Succinate            | 0.76        | [M-H]- | 117.0193                     | 117.0178 | 12.82               | C4H6O4    | 73                     | 0.68        | 0.67  |
| 8                          | Dihydrojasmonic acid | 5.24        | [M+H]+ | 213.1485                     | 213.1474 | 5.16                | C12H20O3  | 71, 107, 125, 171, 195 | 0.74        | 0.49  |
| 9                          | Aconitic acid        | 0.71        | [M-H]- | 173.0092                     | 173.0090 | 1.16                | C6H6O6    | 85, 111, 129, 155      | 0.95        | 1.07  |
| 10                         | Quinic acid          | 3.48        | [M-H]- | 191.0561                     | 191.0563 | 1.05                | C7H12O6   | 85, 93                 | 0.98        | 2.01  |
| 11                         | Shikimic acid        | 3.53        | [M-H]- | 173.0455                     | 173.0452 | 1.73                | C7H10O5   | 129                    | 0.92        | 3.32  |
| Amino acid and derivatives |                      |             |        |                              |          |                     |           |                        |             |       |
| 12                         | Arginine             | 0.54        | [M+H]+ | 175.119                      | 175.1176 | 7.99                | C6H14N4O2 | 60, 70, 116, 130, 158  | 0.71        | 0.90  |
| 13                         | Aspartate            | 0.52        | [M-H]- | 132.0302                     | 132.0297 | 3.79                | C4H7NO4   | 71, 88, 115            | 0.64        | 0.75  |
| 14                         | Glutamate            | 0.55        | [M+H]+ | 148.0604                     | 148.0601 | 2.03                | C5H9NO4   | 84, 102, 130           | 0.96        | 0.84  |
| 15                         | Glutamine            | 0.57        | [M+H]+ | 147.0764                     | 147.0766 | 1.36                | C5H10N2O3 | 84                     | 0.96        | 0.66  |
| 16                         | Histidine            | 0.5         | [M-H]- | 154.0622                     | 154.0613 | 5.84                | C6H9N3O2  | 67, 80, 93, 137        | 0.64        | 0.86  |
| 17                         | Leucine / Isoleucine | 0.77        | [M+H]+ | 132.1019                     | 132.1011 | 6.06                | C6H13NO2  | 57, 69, 86             | 0.58        | 0.70  |
| 18                         | Lysine               | 0.47        | [M+H]+ | 147.1128                     | 147.1124 | 2.72                | C6H14N2O2 | 84                     | 0.42        | 0.72  |
| 19                         | Methionine           | 0.72        | [M+H]+ | 150.0583                     | 150.0586 | 2.00                | C5H11NO2S | 56, 61, 104, 133       | 0.84        | 0.68  |
| 20                         | Ornithine            | 0.51        | [M-H]- | 131.0826                     | 131.0817 | 6.87                | C5H12N2O2 | 70, 72, 114            | 0.67        | 0.89  |
| 21                         | Phenylalanine        | 2.75        | [M-H]- | 164.0717                     | 164.0709 | 4.88                | C9H11NO2  | 103, 147               | 0.60        | 0.70  |

|                      |                   |      |                    |           |           |       |             |                                 |      |      |
|----------------------|-------------------|------|--------------------|-----------|-----------|-------|-------------|---------------------------------|------|------|
| 22                   | Proline           | 0.61 | [M+H] <sup>+</sup> | 116.0706  | 116.0701  | 4.31  | C5H9NO2     | 70                              | 0.65 | 0.89 |
| 23                   | Serine            | 0.57 | [M+H] <sup>+</sup> | 106.0499  | 106.0498  | 0.94  | C3H7NO3     | 74                              | 0.59 | 0.58 |
| 24                   | Threonine         | 0.57 | [M+H] <sup>+</sup> | 120.0655  | 120.0658  | 2.50  | C4H9NO3     | 102, 120                        | 0.89 | 0.70 |
| 25                   | Tryptophan        | 3.24 | [M-H] <sup>-</sup> | 203.0826  | 203.0809  | 8.37  | C11H12N2O2  | 116, 159                        | 0.67 | 0.78 |
| 26                   | Tyrosine          | 2.12 | [M+H] <sup>+</sup> | 182.0812  | 182.0807  | 2.75  | C9H11NO3    | 136                             | 0.87 | 1.00 |
| 27                   | Valine            | 0.7  | [M+H] <sup>+</sup> | 118.0863  | 118.0861  | 1.69  | C5H11NO2    | 72                              | 0.76 | 0.69 |
| 28                   | Dimethylarginine  | 0.66 | [M+H] <sup>+</sup> | 203.1503  | 203.1497  | 2.95  | C8H18N4O2   | 116, 158                        | 0.76 | 0.95 |
| 29                   | Choline           | 0.56 | [M] <sup>+</sup>   | 104.1075  | 104.1061  | 13.45 | C5H14NO     | 58, 59, 60                      | 1.04 | 0.95 |
| 30                   | Acetylcholine     | 0.65 | [M] <sup>+</sup>   | 146.1181  | 146.1169  | 8.21  | C7H16NO2    | 58, 87                          | 2.05 | 1.03 |
| 31                   | Phosphocholine    | 0.55 | [M] <sup>+</sup>   | 184.0739  | 184.0746  | 3.80  | C5H15NO4P   | 88                              | 1.22 | 1.04 |
| 32                   | Pyroglutamate     | 0.57 | [M+H] <sup>+</sup> | 130.0499  | 130.0501  | 1.54  | C5H7NO3     | 56, 84                          | 0.91 | 0.68 |
| 33                   | Betaine           | 0.57 | [M+H] <sup>+</sup> | 118.0863  | 118.0860  | 2.54  | C5H11NO2    | 58, 59                          | 1.39 | 1.02 |
| 34                   | Glutathione       | 1.33 | [M+H] <sup>+</sup> | 308.0911  | 308.0905  | 1.95  | C10H17N3O6S | 179, 233                        | 0.37 | 0.75 |
| 35                   | Carnitine         | 0.59 | [M+H] <sup>+</sup> | 162.1125  | 162.1125  | 0.00  | C7H15NO3    | 57, 58, 60, 85, 102, 103        | 2.20 | 1.16 |
| <b>Sugar</b>         |                   |      |                    |           |           |       |             |                                 |      |      |
| 36                   | Raffinose         | 0.68 | [M-H] <sup>-</sup> | 503.1618  | 503.1595  | 4.57  | C18H32O16   | 59, 89, 119, 161, 179, 323, 341 | 0.59 | 0.75 |
| 37                   | Sucrose           | 0.67 | [M-H] <sup>-</sup> | 341.1089  | 341.1084  | 1.47  | C12H22O11   | 161, 179                        | 0.75 | 0.79 |
| 38                   | Glucose           | 0.57 | [M-H] <sup>-</sup> | 179.0561  | 179.0554  | 3.91  | C6H12O6     | 161                             | 0.54 | 0.67 |
| <b>Glycoside</b>     |                   |      |                    |           |           |       |             |                                 |      |      |
| 39                   | Geniposide        | 3.35 | [M-H] <sup>-</sup> | 387.1297  | 387.1285  | 3.10  | C17H24O10   | 146, 161, 164, 179              | 0.68 | 1.34 |
| 40                   | Woodorien         | 2.92 | [M-H] <sup>-</sup> | 329.0878  | 329.0875  | 0.91  | C14H18O9    | 147, 164, 167                   | 1.18 | 1.04 |
| <b>Triterpenoids</b> |                   |      |                    |           |           |       |             |                                 |      |      |
| 41                   | Echinocystic acid | 7.12 | [M+H] <sup>+</sup> | 473.3625  | 473.3625  | 0.00  | C30H48O4    | 427, 437, 455                   | 1.16 | 0.94 |
| 42                   | Lancemaside A     | 7.14 | [M-H] <sup>-</sup> | 1189.5648 | 1189.5628 | 1.68  | C57H90O26   | 647                             | 0.85 | 0.85 |
| 43                   | Lancemaside B     | 6.38 | [M-H] <sup>-</sup> | 1351.6176 | 1351.6131 | 3.33  | C63H100O31  | 647                             | 0.97 | 0.80 |
| 44                   | Lancemaside C     | 6.92 | [M-H] <sup>-</sup> | 1219.5753 | 1219.5727 | 2.13  | C58H92O27   | 647                             | 1.36 | 0.90 |

|                        |                      |      |           |           |           |      |            |                              |      |      |
|------------------------|----------------------|------|-----------|-----------|-----------|------|------------|------------------------------|------|------|
| 45                     | Lancemaside D        | 6.64 | [M-H]-    | 1087.5331 | 1087.5293 | 3.49 | C53H84O23  | 647                          | 1.62 | 1.05 |
| 46                     | Lancemaside E        | 6.74 | [M-H]-    | 1351.6176 | 1351.6148 | 2.07 | C63H100O31 | 809                          | 1.92 | 1.15 |
| 47                     | Lancemaside G        | 6.42 | [M-H]-    | 1205.5596 | 1205.5569 | 2.24 | C57H90O27  | 663                          | 0.91 | 0.93 |
| 48                     | Aster saponin Hb     | 7.24 | [M-H]-    | 925.4802  | 925.4777  | 2.70 | C47H74O18  | 647                          | 4.60 | 2.24 |
| 49                     | Foetidissimoside A   | 7.08 | [M-H]-    | 1057.5225 | 1057.5178 | 4.44 | C52H82O22  | 647                          | 3.00 | 2.44 |
| 50                     | Codonolaside I       | 7.59 | [M-H]-    | 1203.5804 | 1203.5761 | 3.57 | C58H92O26  | 647                          | 1.44 | 0.95 |
| 51                     | Codonolaside II      | 9.49 | [M-H]-    | 1013.5326 | 1013.5353 | 2.66 | C51H82O20  | 469, 541                     | 1.32 | 0.86 |
| <b>Polyacetylene</b>   |                      |      |           |           |           |      |            |                              |      |      |
| 52                     | Lobetyol             | 4.69 | [M-H]-    | 233.1170  | 233.1170  | 5.58 | C14H18O3   | 103, 133, 145                | 0.67 | 0.99 |
| 53                     | Lobetyolin           | 5.02 | [M+HCOO]- | 441.1757  | 441.1757  | 2.04 | C20H28O8   | 143, 159, 185, 215           | 0.84 | 0.89 |
| 54                     | Lobetyolinin         | 4.53 | [M+HCOO]- | 603.2280  | 603.2280  | 2.32 | C26H38O13  | 179, 323, 221, 341, 467      | 0.84 | 0.98 |
| 55                     | Lobetyolinin sulfate | 0.69 | [M-H]-    | 637.1822  | 637.1822  | 2.35 | C26H38O16S | 71, 115, 133                 | 0.69 | 0.82 |
| 56                     | Capillene            | 5.02 | [M+H]+    | 155.0856  | 155.0856  | 0.64 | C12H10     | 115, 127, 153                | 0.93 | 0.94 |
| <b>Phenylpropanoid</b> |                      |      |           |           |           |      |            |                              |      |      |
| 57                     | Syringin             | 3.56 | [M+NH4]+  | 390.1741  | 390.1741  | 4.61 | C17H24O9   | 105, 133, 161, 193           | 1.59 | 2.14 |
| 58                     | Tangshenoside I      | 3.91 | [M-H]-    | 677.2278  | 677.2278  | 2.95 | C29H42O18  | 261, 453, 497                | 1.05 | 1.22 |
| 59                     | Tangshenoside II     | 3.56 | [M+HCOO]- | 417.1390  | 417.1390  | 2.88 | C17H24O9   | 194, 209                     | 1.33 | 1.60 |
| 60                     | Tangshenoside IV     | 4.34 | [M-H]-    | 1031.3563 | 1031.3563 | 4.85 | C46H64O26  | 261, 383, 545, 645, 807, 851 | 3.80 | 5.37 |
| 61                     | Tangshenoside VIII   | 4.53 | [M+Na]+   | 1055.3590 | 1055.359  | 0.66 | C46H64O26  | 193, 553, 701                | 2.64 | 5.22 |
| 62                     | 6-Methylcoumarin     | 3.9  | [M+H]+    | 161.0587  | 161.0587  | 6.21 | C10H8O2    | 105, 115, 118, 133           | 1.49 | 1.91 |
| 63                     | Myristicin           | 3.9  | [M+H]+    | 193.0845  | 193.0845  | 7.25 | C11H12O3   | 105, 115, 133, 161           | 1.38 | 1.65 |
| 64                     | Salicylic acid       | 3.15 | [M-H]-    | 137.0233  | 137.0233  | 8.03 | C7H6O3     | 65, 93, 95, 121              | 0.86 | 0.75 |
| 65                     | Scopoletin           | 3.16 | [M+H]+    | 193.0483  | 193.0483  | 6.22 | C10H8O4    | 133                          | 0.89 | 1.06 |
| 66                     | Phenylacetate        | 3.14 | [M-H]-    | 135.0445  | 135.0445  | 5.18 | C8H8O2     | 93                           | 0.84 | 0.85 |
| 67                     | Ferulic acid         | 3.36 | [M-H]-    | 193.0495  | 193.0495  | 5.70 | C10H10O4   | 134                          | 0.98 | 2.79 |
| 68                     | Gallic acid          | 2.67 | [M+H]+    | 171.0284  | 171.0284  | 2.34 | C7H6O5     | 153                          | 1.72 | 0.69 |

|                  |                                                                                             |      |                       |          |          |       |            |                            |      |      |
|------------------|---------------------------------------------------------------------------------------------|------|-----------------------|----------|----------|-------|------------|----------------------------|------|------|
| 69               | Coumaric acid                                                                               | 4.1  | [M+H] <sup>+</sup>    | 165.0542 | 165.0542 | 2.42  | C9H8O3     | 91, 119, 147               | 0.69 | 1.06 |
| 70               | Gentisic acid                                                                               | 2.87 | [M+H] <sup>+</sup>    | 155.0331 | 155.0331 | 5.16  | C7H6O4     | 81, 137                    | 1.91 | 0.77 |
| 71               | 7-Hydroxycoumarin                                                                           | 3.47 | [M+H] <sup>+</sup>    | 163.0388 | 163.0388 | 1.23  | C9H6O3     | 77, 89, 145                | 1.02 | 2.25 |
| 72               | Caffeic acid                                                                                | 3.15 | [M-H] <sup>-</sup>    | 179.0348 | 179.0348 | 1.12  | C9H8O4     | 59, 93, 135                | 0.80 | 0.80 |
| 73               | 3-Hydroxybenzoic acid                                                                       | 2.56 | [M+H] <sup>+</sup>    | 139.0382 | 139.0382 | 5.75  | C7H6O3     | 77, 95, 121                | 1.13 | 0.96 |
| 74               | Protocatechuic acid                                                                         | 3.26 | [M-H] <sup>-</sup>    | 153.0185 | 153.0185 | 5.23  | C7H6O4     | 109, 135                   | 1.07 | 0.69 |
| 75               | Chlorogenic acid                                                                            | 3.48 | [M-H] <sup>-</sup>    | 353.0870 | 353.0870 | 2.27  | C16H18O9   | 191                        | 0.99 | 2.19 |
| 76               | Cinnamaldehyde                                                                              | 3.91 | [M+H] <sup>+</sup>    | 133.0638 | 133.0638 | 7.52  | C9H8O      | 77, 79, 103, 105, 115      | 1.50 | 1.97 |
| 77               | Cinnamic acid                                                                               | 2.75 | [M-H] <sup>-</sup>    | 147.0442 | 147.0442 | 6.80  | C9H8O2     | 103, 131                   | 0.62 | 0.71 |
| <b>Flavonoid</b> |                                                                                             |      |                       |          |          |       |            |                            |      |      |
| 78               | Kaempferol-O-glucoside                                                                      | 4.38 | [M+H] <sup>+</sup>    | 449.1078 | 449.1064 | 3.12  | C21H20O11  | 287                        | 2.24 | 2.27 |
| <b>Others</b>    |                                                                                             |      |                       |          |          |       |            |                            |      |      |
| 79               | Tianshi acid                                                                                | 8.16 | [M-H] <sup>-</sup>    | 329.2333 | 329.2339 | 1.82  | C18H34O5   | 171, 211, 229              | 0.97 | 0.86 |
| 80               | 4-Methylnicotinic acid                                                                      | 0.63 | [M+H] <sup>+</sup>    | 138.0550 | 138.0546 | 2.90  | C7H7NO2    | 65, 78, 92, 120            | 0.80 | 0.88 |
| 81               | Adenosine                                                                                   | 2.43 | [M+H] <sup>+</sup>    | 268.1040 | 268.1040 | 0.00  | C10H13N5O4 | 136                        | 0.88 | 0.89 |
| 82               | Pantothenic acid                                                                            | 2.93 | [M+H] <sup>+</sup>    | 220.1179 | 220.1170 | 4.09  | C9H17NO5   | 90, 98, 116, 124, 184, 202 | 0.71 | 0.74 |
| 83               | Indole                                                                                      | 3.25 | [M+H] <sup>+</sup>    | 118.0651 | 118.0642 | 7.62  | C8H7N      |                            | 0.77 | 0.81 |
| 84               | 2-Methylindole                                                                              | 3.25 | [M+H] <sup>+</sup>    | 132.0808 | 132.0811 | 2.27  | C9H9N      | 105, 117                   | 0.77 | 0.81 |
| 85               | (E)-2-Hexenyl- $\alpha$ -L-arabinopyranosyl-(1 $\rightarrow$ 2)- $\beta$ -D-glucopyranoside | 4.16 | [M-H] <sup>-</sup>    | 393.1766 | 393.1760 | 1.53  | C17H30O10  | 261, 149                   | 3.69 | 2.81 |
| 86               | 6-Methylquinoline                                                                           | 3.26 | [M+H] <sup>+</sup>    | 144.0808 | 144.0800 | 5.55  | C10H9N     | 91, 117                    | 0.77 | 0.81 |
| 87               | Benzaldehyde                                                                                | 2.77 | [M+H] <sup>+</sup>    | 107.0491 | 107.0488 | 2.80  | C7H6O      | 77, 79                     | 0.68 | 0.75 |
| 88               | Hexyl- $\beta$ -D-glucopyranosyl-(1 $\rightarrow$ 2)- $\beta$ -D-glucopyranoside            | 4.23 | [M-H] <sup>-</sup>    | 425.2028 | 425.2023 | 1.18  | C18H34O11  | 101, 263                   | 2.81 | 1.18 |
| 89               | Hexyl- $\beta$ -D-glucoside sulfate                                                         | 3.09 | [M-H] <sup>-</sup>    | 343.1068 | 343.1028 | 11.66 | C12H24O9S  | 163                        | 1.35 | 0.88 |
| 90               | Indoleacrylic acid                                                                          | 3.25 | [M+H] <sup>+</sup>    | 188.0706 | 188.0697 | 4.79  | C11H9NO2   | 170                        | 0.79 | 0.82 |
| 91               | Indolelactic acid                                                                           | 3.62 | [M+H] <sup>+</sup>    | 206.0812 | 206.0805 | 6.40  | C11H11NO3  | 118, 130, 160, 188         | 1.08 | 1.02 |
| 92               | Codonopyrrolidinium A                                                                       | 4.46 | [M+HCOO] <sup>-</sup> | 395.1949 | 395.1895 | 13.66 | C19H28NO5  | 101, 131, 161, 263         | 3.02 | 1.84 |

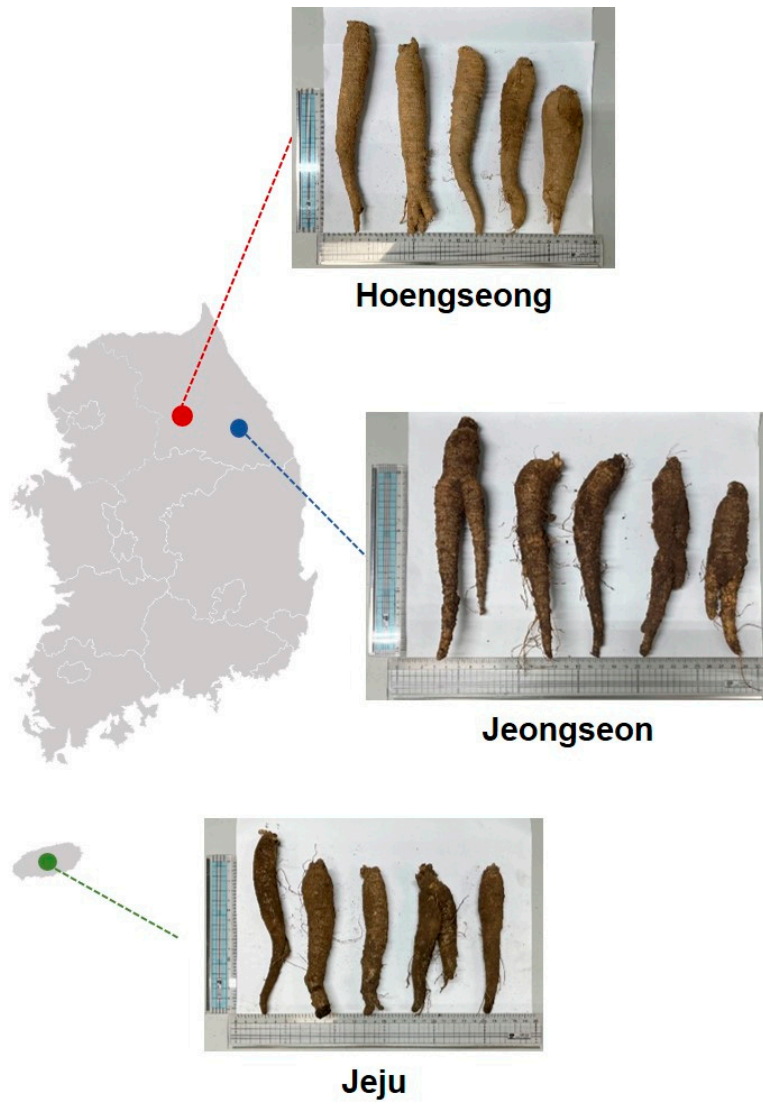

**Figure S1.** Geographical locations and representative samples of *C. lanceolata*.

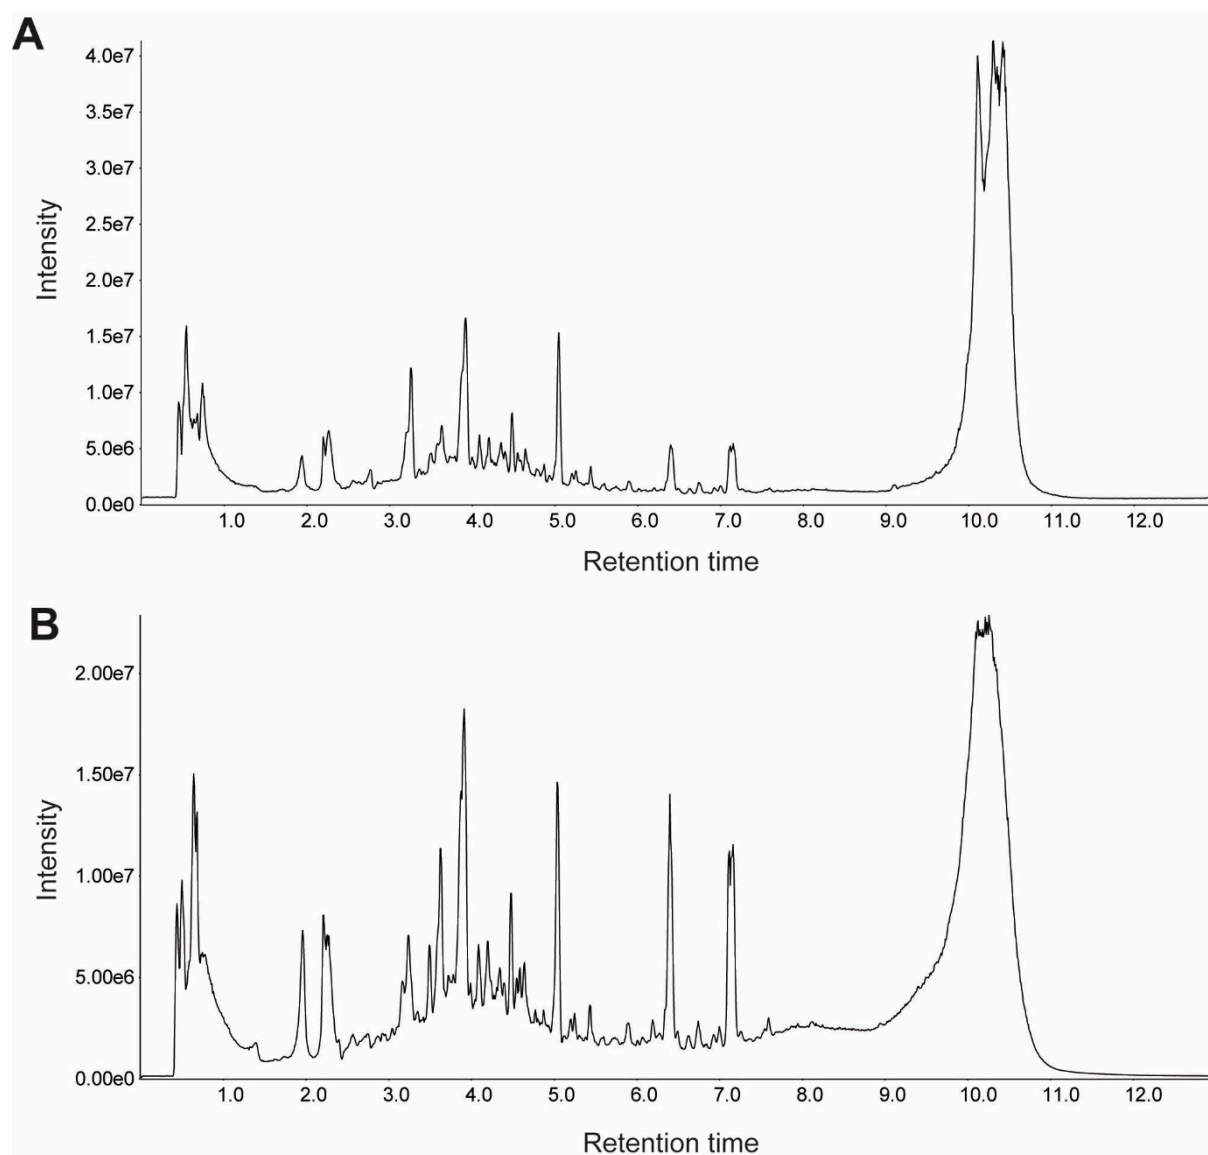

**Figure S2.** Total ion chromatograms of *C. lanceolata* extracts under positive ionization (A) and negative ionization (B).

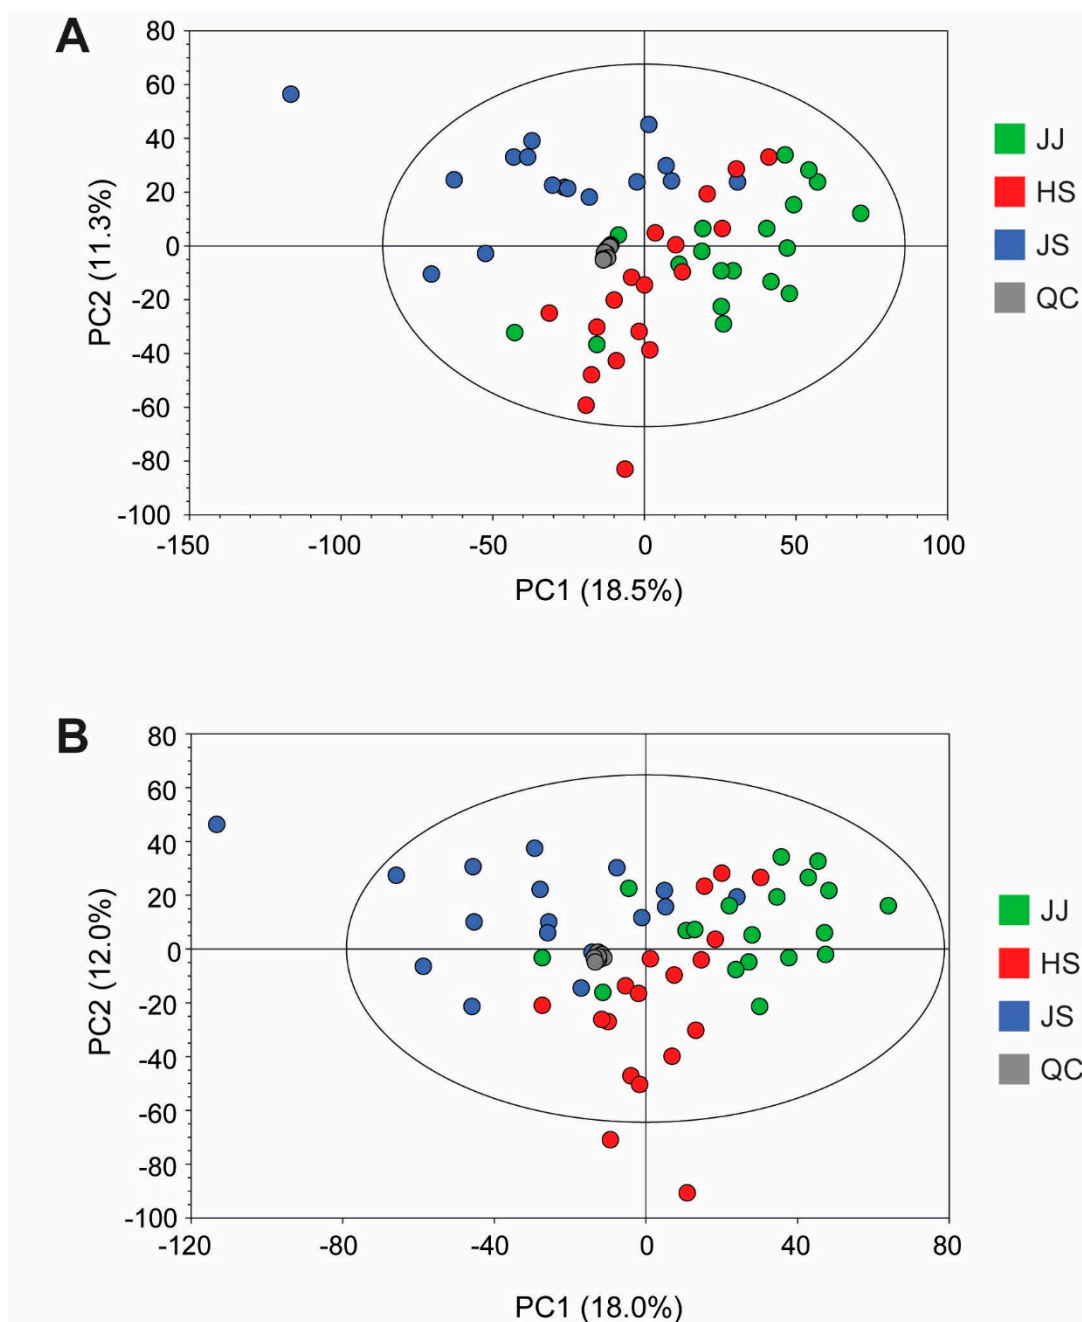

**Figure S3.** PCA score plot derived from the spectra of the positive (A) and negative (B) mode of UPLC-QTOF-MS in *C. lanceolata* extracts obtained from three different geographical origins.
